# Supplementary material for: Root System Architecture Plasticity of Bread Wheat in Response to Oxidative Burst under Extended Osmotic Stress
Source: MDPI journal article supplement (doi:10.3390/plants10050939), 2021-05-08
Supplement: s1 [file s1]

## Supplementary Materials

**Table S1.** Origin and pedigree of eight genotypes represent different geographical regions

|   |           |                                                           |                                                                  |
|---|-----------|-----------------------------------------------------------|------------------------------------------------------------------|
| 1 | Drysdale  | Australia                                                 | Hartog x 3 / Quarrior                                            |
| 2 | Giles     | Australia                                                 | Jauz/Vulian                                                      |
| 3 | Irena     | International Maize and Wheat Improvement Center (CIMMYT) | BUCKBUCK/FLICKER//MYNA/VULTURE                                   |
| 4 | Sakha 94  | Egypt, Agricultural Research Center                       | Opata/Rayon//Kauz                                                |
| 5 | Verry     | USA                                                       | KAVKAZ/BUHO//KALYANSONA/BLUEBIRD                                 |
| 6 | Klassic   | USA                                                       | KLEIN-RENDIDOR/2*SONORA-64//INIA-66/3/CIANO-67/4/YECORA-70       |
| 7 | Gemmiza 7 | Egypt, Agricultural Research Center                       | CMH 74A.360 / SX // SERI 8213 / AGENT<br>CGM4611-2GM-3GM-1GM-0GM |
| 8 | Gemmiza12 | Egypt, Agricultural Research Center                       | OTUS/3/SARA/THB//VEE                                             |

**Table S2.** Scavenging activity of different root extract concentrations of various wheat genotypes under control and osmotic treatments. The values are average ( $n = 3$ )  $\pm$  standard deviation

| Treatment      | Concentration (g mL <sup>-1</sup> ) |             |             |             |             |
|----------------|-------------------------------------|-------------|-------------|-------------|-------------|
|                | 1000                                | 750         | 500         | 250         | 125         |
| <b>Control</b> |                                     |             |             |             |             |
| Drysdale       | 3.840                               | 3.522       | 2.658       | 2.249       | 0.818       |
|                | $\pm 0.085$                         | $\pm 0.179$ | $\pm 0.056$ | $\pm 0.111$ | $\pm 0.147$ |
| Giles          | 3.976                               | 2.886       | 2.249       | 1.659       | 0.841       |
|                | $\pm 0.232$                         | $\pm 0.116$ | $\pm 0.096$ | $\pm 0.085$ | $\pm 0.179$ |
| Sakha94        | 3.704                               | 3.272       | 2.954       | 2.068       | 1.500       |
|                | $\pm 0.085$                         | $\pm 0.056$ | $\pm 0.085$ | $\pm 0.116$ | $\pm 0.167$ |
| Irena          | 2.363                               | 2.000       | 1.659       | 0.818       | 0.432       |
|                | $\pm 0.085$                         | $\pm 0.064$ | $\pm 0.116$ | $\pm 0.167$ | $\pm 0.085$ |
| Veery          | 0.886                               | 0.477       | 0.318       | 0.182       | 0.078       |
|                | $\pm 0.056$                         | $\pm 0.056$ | $\pm 0.032$ | $\pm 0.032$ | $\pm 0.008$ |
| Klassic        | 1.704                               | 1.295       | 0.863       | 0.523       | 0.341       |
|                | $\pm 0.056$                         | $\pm 0.056$ | $\pm 0.140$ | $\pm 0.032$ | $\pm 0.056$ |
| Gemmiza7       | 1.659                               | 1.318       | 1.000       | 0.523       | 0.318       |
|                | $\pm 0.085$                         | $\pm 0.085$ | $\pm 0.179$ | $\pm 0.085$ | $\pm 0.085$ |
| Gemmiza12      | 2.045                               | 1.795       | 1.454       | 1.113       | 0.682       |
|                | $\pm 0.111$                         | $\pm 0.032$ | $\pm 0.085$ | $\pm 0.032$ | $\pm 0.096$ |
| <b>Osmotic</b> |                                     |             |             |             |             |
| Drysdale       | 30.479                              | 26.324      | 23.379      | 19.909      | 16.644      |
|                | $\pm 0.148$                         | $\pm 0.196$ | $\pm 0.141$ | $\pm 0.085$ | $\pm 0.148$ |
| Giles          | 31.347                              | 24.429      | 20.411      | 20.114      | 16.301      |
|                | $\pm 0.318$                         | $\pm 0.613$ | $\pm 0.148$ | $\pm 0.171$ | $\pm 0.168$ |
| Sakha94        | 39.132                              | 34.612      | 29.543      | 24.817      | 15.799      |
|                | $\pm 0.141$                         | $\pm 0.196$ | $\pm 0.196$ | $\pm 0.196$ | $\pm 3.569$ |
| Irena          | 5.959                               | 3.790       | 3.151       | 2.374       | 2.146       |
|                | $\pm 0.112$                         | $\pm 0.171$ | $\pm 0.202$ | $\pm 0.085$ | $\pm 0.085$ |
| Veery          | 5.685                               | 4.247       | 3.881       | 3.037       | 1.826       |
|                | $\pm 0.148$                         | $\pm 0.202$ | $\pm 0.141$ | $\pm 0.171$ | $\pm 0.180$ |
| Klassic        | 10.822                              | 7.055       | 5.000       | 3.196       | 2.740       |
|                | $\pm 0.437$                         | $\pm 0.148$ | $\pm 0.202$ | $\pm 0.141$ | $\pm 0.056$ |
| Gemmiza7       | 2.329                               | 2.009       | 1.438       | 0.982       | 0.639       |
|                | $\pm 0.244$                         | $\pm 0.116$ | $\pm 0.112$ | $\pm 0.196$ | $\pm 0.085$ |
| Gemmiza12      | 20.137                              | 19.155      | 17.740      | 16.849      | 16.050      |
|                | $\pm 0.202$                         | $\pm 0.085$ | $\pm 0.112$ | $\pm 0.256$ | $\pm 0.233$ |

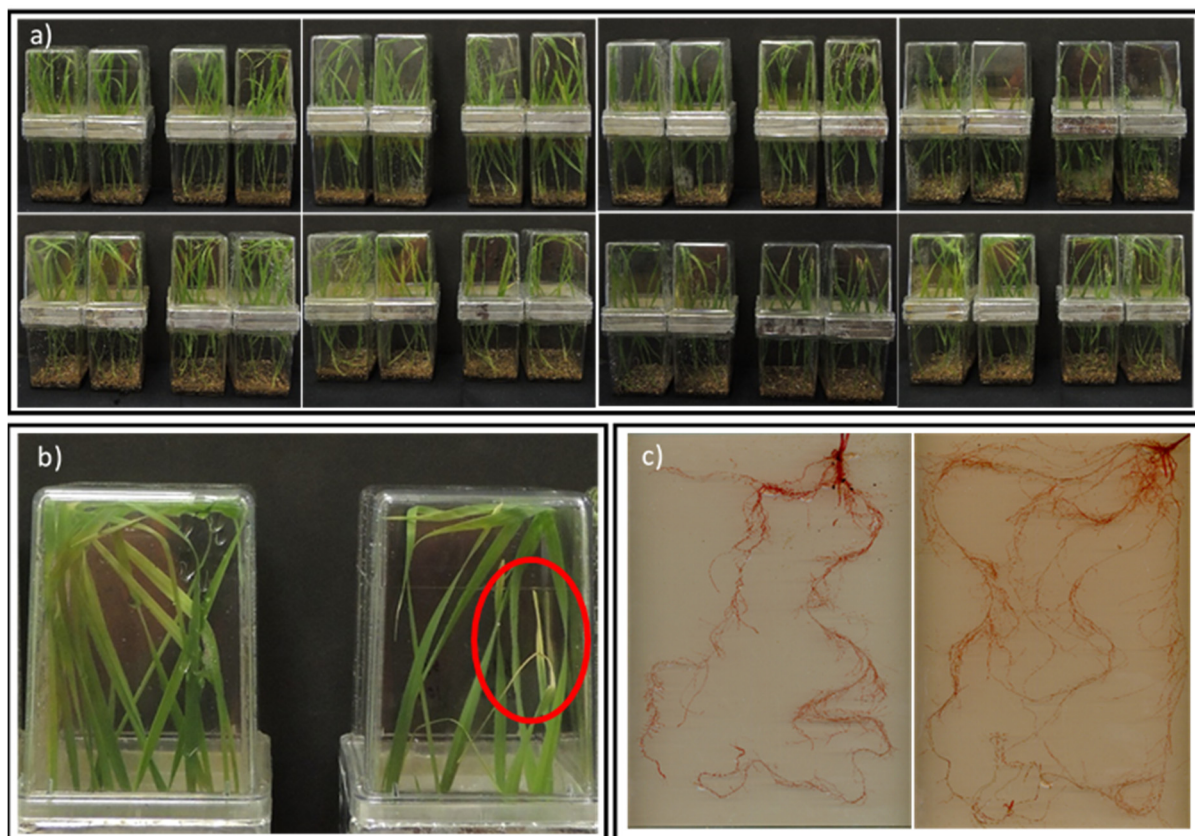

**Figure S1.** Eight bread wheat genotypes were grown in magenta boxes. **a)** Selected two magenta boxes from three replicates under both treatments, where the control treatment to the left and the osmotic treatment to the right. **b)** indicating stress signs inside the red circle after 14 days after treatment, where control treatment to the left and the 10% PEG treatment on the right. **c)** two selected genotypes roots, where adapted genotype to the right and the non-adapted genotype to the left.

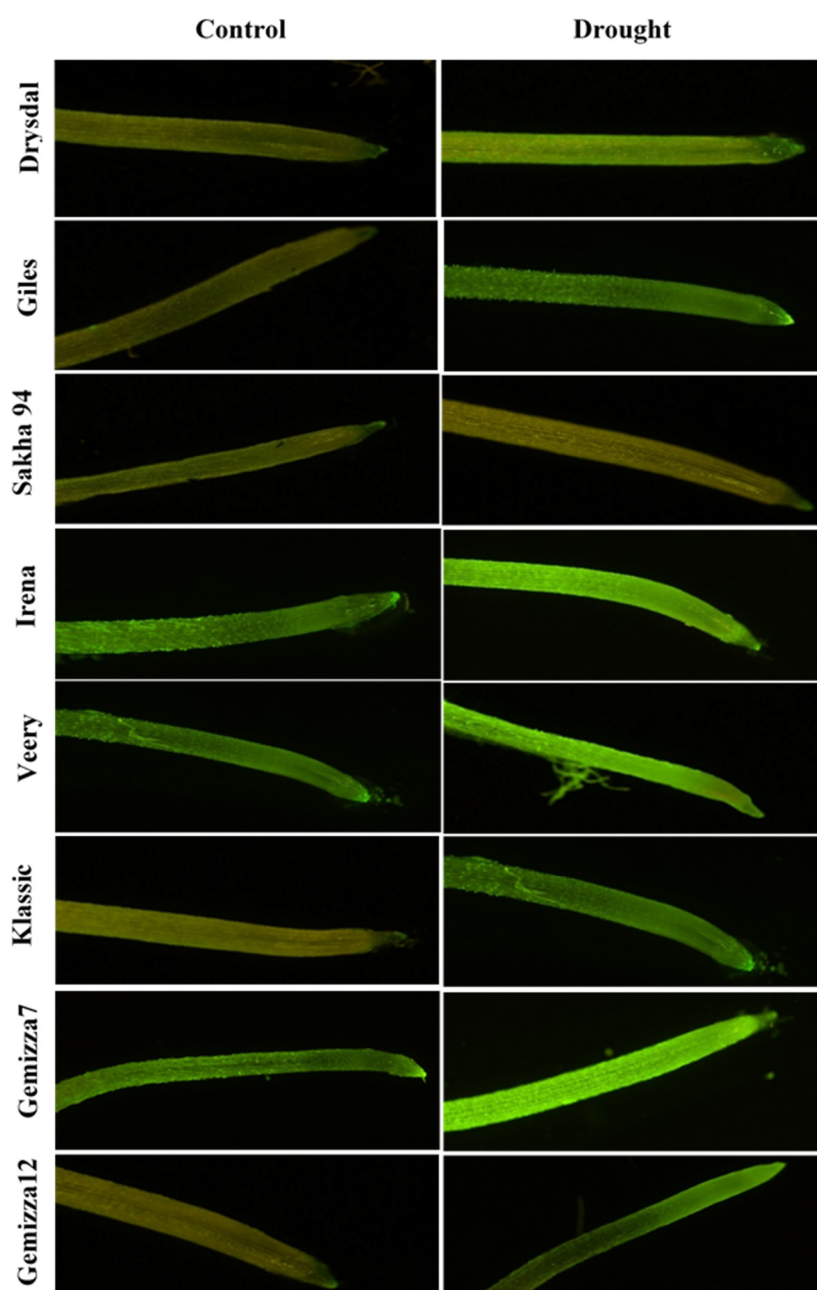

**Figure S2.** DCF-stained root tips of each genotype under both treatments, control treatment to the left and the 10% PEG treatment on the right indicating ROS accumulation due to treatment.

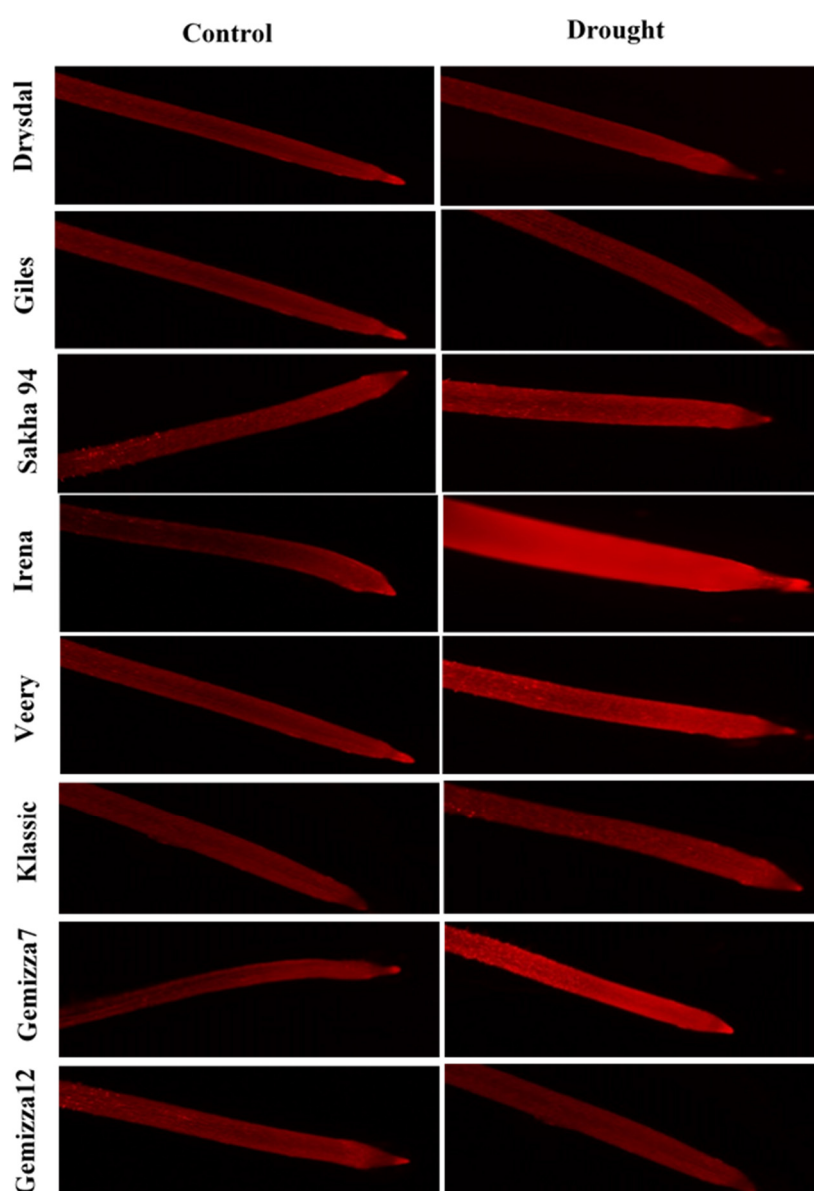

**Figure S3.** Rh123-stained root tips of each genotype under both treatments, control treatment to the left and the 10% PEG treatment on the right.
